1 **Title:** Bayesian population receptive field modeling in human somatosensory cortex

2 **Abbreviated (running) title:** Somatosensory pRF modeling

3 **Authors/Affiliations:**

4 Alexander M. Puckett<sup>a,b</sup>, Saskia Bollmann<sup>c</sup>, Keerat Junday<sup>a</sup>, Markus Barth<sup>c,d</sup>, Ross  
5 Cunnington<sup>a,b</sup>

6 <sup>a</sup>Queensland Brain Institute, The University of Queensland; Brisbane QLD 4072;  
7 Australia

8 <sup>b</sup>School of Psychology, The University of Queensland; Brisbane QLD 4072; Australia

9 <sup>c</sup>Centre for Advanced Imaging, The University of Queensland; Brisbane QLD  
10 4072; Australia

11 <sup>d</sup>School of Information Technology and Electrical Engineering, The University of  
12 Queensland; Brisbane QLD 4072; Australia

13

14 **Corresponding author:**

15 Alexander M. Puckett

16 QBI Building #79

17 University of Queensland

18 St. Lucia QLD 4072

19 Australia

20 Email: [pucketta@alumni.msoe.edu](mailto:pucketta@alumni.msoe.edu)

21 **Abstract**

22 Somatosensation is fundamental to our ability to sense our body and interact with the  
23 world. Our body is continuously sampling the environment using a variety of receptors  
24 tuned to different features, and this information is routed up to primary somatosensory  
25 cortex. Strikingly, the spatial organization of the peripheral receptors in the body are  
26 well maintained, with the resulting representation of the body in the brain being  
27 referred to as the somatosensory homunculus. Recent years have seen considerable  
28 advancements in the field of high-resolution fMRI, which have enabled an increasingly  
29 detailed examination of the organization and properties of this homunculus. Here we  
30 combined advanced imaging techniques at ultra-high field (7T) with a recently  
31 developed Bayesian population receptive field (pRF) modeling framework to examine  
32 pRF properties in primary somatosensory cortex. In each subject, vibrotactile  
33 stimulation of the fingertips (i.e., the peripheral mechanoreceptors) modulated the  
34 fMRI response along the post-central gyrus and these signals were used to estimate  
35 pRFs. We found the pRF center location estimates to be in accord with previous work  
36 as well as evidence of other properties in line with the underlying neurobiology.  
37 Specifically, as expected from the known properties of cortical magnification, we find  
38 a larger representation of the index finger compared to the other stimulated digits  
39 (middle, index, little). We also show evidence that the little finger is marked by the  
40 largest pRF sizes. The ability to estimate somatosensory pRFs in humans provides an  
41 unprecedented opportunity to examine the neural mechanisms underlying  
42 somatosensation and is critical for studying how the brain, body, and environment  
43 interact to inform perception and action.

44 **Keywords**

45 high-resolution, fMRI, 7T, 3D-EPI, human, somatotopy, receptive field, touch,

46 homunculus, mechanoreceptor, body, brain

47 **1. Introduction**

48 Mechanoreceptors permeate the human body and serve as key communicators  
49 between the body and the brain. They are ubiquitous near the very boundary of the  
50 body, embedded throughout the skin (Horch et al., 1977; Vallbo and Hagbarth, 1968).  
51 They are also distributed deep within the body, being found in articular tissues such  
52 as joint capsules and menisci (Zimny, 1988; Zimny et al., 1988). As such,  
53 mechanoreceptors are responsible for responding to information about both the  
54 external environment (i.e., exteroception) and about the state of the body itself (i.e.,  
55 proprioception). The signals from these peripheral receptors are transmitted via the  
56 spinal cord to somatosensory cortex; the processing there being fundamental to our  
57 sensation of touch (Kandel et al. 2000). Information, originating from the various  
58 receptors, is then further fed forward to be utilized by a greater network of cortical  
59 areas (Mauguiere et al., 1997). This network of areas integrates the somatosensory  
60 information with other sensory and motor information critical for haptic perception as  
61 well as a wide range of sensorimotor tasks necessary for interacting with the  
62 environment (Haegens et al., 2011; Lederman and Klatzky, 2009).

63

64 A great deal of scientific work has been done to understand the organization and  
65 function at each stage of processing between the mechanoreceptors and the cortex.  
66 For this, recordings have been made in the periphery, directly from single nerve fibers  
67 carrying information from cutaneous receptors (Johansson, 1978), as well as from  
68 various stages in the central nervous system (Celesia, 1979; Ibanez et al., 1992).  
69 These studies have spanned animal (Fleetwood-Walker et al., 1988; Liu et al., 2013)  
70 and human models (Vallbo and Johansson, 1984) and have drawn upon a wide variety  
71 of both invasive (Jeanmonod et al., 1989) and non-invasive (Davis et al., 1998)

72 measurement techniques. In humans, it has been shown that the signals from  
73 mechanoreceptors are routed through the dorsal horn and the thalamus, where some  
74 lower-order processing occurs, before reaching the cortex for higher-order processing.  
75 One striking aspect of the organization of this system is that the spatial relationship  
76 among the receptors in the body is conserved along this journey between the body  
77 and the brain (Hong et al., 2011; Yamada et al., 2007), the consequence of which is  
78 the presence of an orderly, somatotopically organized representation of the body in  
79 primary somatosensory cortex – i.e., the sensory homunculus (Schott, 1993).

80

81 The modern-day concept of the sensory homunculus originated from the neurological  
82 work of Wilder Penfield and Edwin Boldrey (Penfield and Boldrey, 1937). Published in  
83 1937, Penfield and Boldrey presented summary data from the electrical stimulation of  
84 sensorimotor cortex in 126 surgical patients – finding an orderly map of the body within  
85 the brain. They depicted this using a distorted drawing of the human body, with the  
86 distortions reflecting the amount of cortex associated with the somatosensory or motor  
87 functions of the depicted body part. This concept was named the homunculus (Latin  
88 for “little man”), and has significantly impacted scientific research in the field and  
89 related neurosurgical practice since (Catani, 2017). Although many aspects of the  
90 homunculus are still under debate (e.g., degree of specificity / overlap among  
91 neighboring somatotopic locations, boundary between motor and somatosensory  
92 areas, and individual variability in somatotopic maps), what is clear is that the basic  
93 spatial organization of the receptors in the body is reflected in the cortex.

94

95 Not only is the spatial organization of the mechanoreceptors represented in an orderly  
96 fashion within the brain, but the amount of cortex dedicated to each body part has

97 been shown to generally correspond to the density of innervation – and perhaps more  
98 importantly – the behavioral relevance of that body part (Catania and Henry, 2006).  
99 Moreover, the response characteristics of cortical neurons in somatosensory cortex  
100 are similar to the mechanoreceptors in the periphery. Pertinently, as is the case with  
101 the mechanoreceptors of the body (Johansson, 1978), these neurons do not respond  
102 to a single location in body space, but are instead, characterized by a topographic  
103 sensitivity profile – i.e., a receptive field (RF).

104

105 Although measuring RF properties from peripheral nerves is possible in healthy  
106 human volunteers as it is minimally invasive, measuring somatosensory RF properties  
107 within the cortex has been mainly restricted to animal models and patient populations  
108 (e.g., those already planned to undergo surgery (Lenz et al., 1988)). Consequently, it  
109 has been difficult to examine and compare the response properties throughout each  
110 stage of somatosensory processing in awake and behaving humans. This has begun  
111 to shift, however, with the invention and subsequent refinement of non-invasive  
112 neuroimaging techniques. Basic demonstrations of tactile stimulation eliciting cortical  
113 activation within human S1 were shown using Positron Emission Tomography (PET)  
114 (Fox et al., 1987; Greenberg et al., 1981). Using functional magnetic resonance  
115 imaging (fMRI), it later became possible to resolve this activity with such detail that the  
116 responses could be attributed to the stimulation of individual fingers (Francis et al.,  
117 2000; Gelnar et al., 1998). More recently, high-resolution fMRI has borne evidence  
118 that human S1 actually contains multiple orderly somatotopic maps of the fingers, both  
119 across (Martuzzi et al., 2014; Sanchez-Panchuelo et al., 2010) and within (Sanchez-  
120 Panchuelo et al., 2012) digits.

121

122 It is evident that high-resolution fMRI is closing the gap between the  
123 electrophysiological-based recordings and non-invasive estimates of cortical RF  
124 properties. Being able to use fMRI to map the organization of S1, for example, shows  
125 its ability to estimate the somatotopic location of each imaging voxel's receptive field.  
126 Other measures such as a voxel's response profile to stimulation of body space on  
127 and around the center of its receptive field (Besle et al., 2014; Martuzzi et al., 2014)  
128 can be seen as estimates of the size of that voxel's RF. It is important to note here  
129 that a voxel's RF is more properly referred to as its population receptive field (pRF).  
130 This distinction is critical as the pRF of a voxel is the estimate of the receptive field  
131 properties of a summed population of neurons (i.e., all the neurons within the volume  
132 of an imaging voxel), rather than the RF of a single neuron. With this knowledge and  
133 thoughtful experimental designs, however, it is possible to non-invasively gain  
134 unprecedented insight into the receptive field properties of the neurons contained  
135 within each voxel.

136

137 Here we extend this line of research by using previously collected, high-resolution  
138 fMRI somatotopic mapping data (Puckett et al., 2017) with a novel Bayesian pRF  
139 modeling framework (Zeidman et al., 2018) to demonstrate the feasibility of using  
140 vibrotactile driven sensory responses in S1 to directly estimate each voxel's pRF. The  
141 pRF modeling approach marks an improvement over conventional phase-encoded  
142 techniques (Puckett et al., 2017; Sanchez-Panchuelo et al., 2010) by providing an  
143 estimate of not only the preferred fingertip (pRF center location) but also the size and  
144 shape (i.e., the topography) of the pRF. Moreover, the Bayesian approach to pRF  
145 modeling has advantages over the traditional pRF technique (Dumoulin and Wandell,  
146 2008) by providing estimates of the uncertainty associated with the pRF parameter

147 estimates, by accounting for variability in the hemodynamic response across the brain,  
148 and by providing a formal framework to test competing pRF models (e.g., Gaussian  
149 vs. Difference of Gaussian or symmetrical vs. asymmetrical profiles).

150

## 151 **2. Materials and Methods**

### 152 2.1 Subjects

153 Six, right-handed subjects (23-31 years, mean 27 years) with no history of neurological  
154 or psychiatric diseases completed the original experiment (Puckett et al., 2017). The  
155 experiment was conducted with the written consent of each subject and was approved  
156 by the local ethics committee in accordance with national guidelines.

157

### 158 2.2 Stimulation and tasks

159 Here we used data from only one of the experimental conditions (i.e., the sensory  
160 condition) from the original study to perform the pRF mapping. During this condition,  
161 tactile stimulation was delivered via a MR-compatible, piezoelectric, vibrotactile  
162 stimulator ([www.hybridmojo.com](http://www.hybridmojo.com)). The device consisted of 4 units, each able to deliver  
163 vibrotactile stimulation to the pad (i.e. volar surface) of a single fingertip. The  
164 stimulation timing and frequency could be controlled independently for each unit.

165

166 During each run, the 4 fingertips (index, middle, ring, and little) of the right hand were  
167 sequentially stimulated using a phase-encoded design (Besle et al., 2013; DeYoe et  
168 al., 1996; Engel, 2012; Engel et al., 1994; Sereno et al., 1995). For this, each individual  
169 fingertip was stimulated for 7872 ms before moving to the next. Each cycle of  
170 stimulation began with the index finger and ended with the little finger. Stimulation then  
171 returned to the index finger to begin another stimulation cycle. The frequency of



172 stimulation changed every 1968 ms (synced with the MRI scanner repetition time),  
173 and three frequencies were used (5, 20, and 100 Hz). The stimulation frequency was  
174 programmed to change randomly among the three frequencies, except that the same  
175 frequency could not occur twice in a row at a fingertip. Each run was comprised of 5  
176 cycles of stimulation (31.5 s in duration each).

177

### 178 2.3 Magnetic resonance imaging data acquisition

179 Data were acquired on a MAGNETOM 7T whole-body research scanner (Siemens  
180 Healthcare, Erlangen, Germany) with a 32-channel head coil (Nova Medical,  
181 Wilmington, US). Whole-brain, anatomical images were collected using an MP2RAGE  
182 sequence (Marques et al., 2010) with a TE of 2.88 ms, TR of 4300 ms, flip angles of  
183 5 and 6 degrees,  $T_{11}$  of 840 ms,  $T_{12}$  of 2370 ms, FOV of 201 mm x 224 mm x 144 mm,  
184 and a matrix size of 378 x 420 x 288 - resulting in an isotropic voxel size of 0.5 mm.

185

186 Functional data were collected using a 3D-EPI sequence (Poser et al., 2010) with a  
187 blipped CAIPIRINHA (Breuer et al., 2006; Setsompop et al., 2012) implementation  
188 (Poser et al. 2014a; Poser et al. 2014b; Zahneisen et al., 2015). Scan parameters  
189 were as follows: TE of 30 ms, TR of 82 ms, flip angle of 17 degrees, echo spacing of  
190 0.97 ms, FOV of 160 mm x 160 mm x 39 mm, and a matrix size of 192 x 192 x 48 –  
191 resulting in an isotropic voxel size of 0.8 mm. The acquisition was accelerated by a  
192 factor of 2 in-plane and by a factor of 2 in the slice-encoding direction with a CAIPI-  
193 shift of 1 using the GRAPPA (Griswold et al., 2002) image reconstruction pipeline as  
194 provided by the vendor – resulting in a total acceleration factor of 4 and an effective  
195 volume TR of 1968 ms. The acquisition slab was positioned obliquely to ensure  
196 adequate coverage of S1 in the left hemisphere, contralateral to the stimulated

197 fingertips. 12 runs of stimulation were collected in a single scan session yielding  
198 approximately 1 hour of data per subject to be used for the pRF modeling. Periods of  
199 baseline fMRI activity were also measured during each run with the sensory condition  
200 beginning and ending with a 31.5 s block of rest (no tactile stimulation). The 5 cycles  
201 of stimulation occurred between these blocks.

202

#### 203 2.4 Preprocessing

204 MRI data were pre-processed using the AFNI/SUMA analysis package (Cox, 1996;  
205 Saad and Reynolds, 2012) as follows: volume registration of the functional data,  
206 alignment of the anatomical and the functional data, averaging of time courses,  
207 removal of baseline periods, and then smoothing. For volume registration, each EPI  
208 volume was registered to the minimum outlier fraction volume (i.e. the volume that is  
209 least different from all the others after detrending). To bring the anatomical and  
210 functional data into alignment, the anatomical dataset was skull-stripped and then  
211 aligned to this same EPI base using AFNI's align\_epi\_anat.py script. The time-courses  
212 for all 12 runs of stimulation were then averaged at each voxel across the repetitions,  
213 and the baseline periods were removed. To increase signal-to-noise while maintaining  
214 the spatial resolution necessary to resolve cortical representations of individual  
215 fingertips (Martuzzi et al., 2014), the images were smoothed using a 1.2 mm Gaussian  
216 kernel.

217

#### 218 2.5 Previous delay analysis

219 For details on the original delay analysis see our previous publication (Puckett et al.,  
220 2017). Because we compare the results from the Bayesian pRF modeling approach  
221 to that from the delay analysis, a brief summary of this analysis is provided here.

222

223 The fMRI response delay was calculated at each voxel using a Phase estimator based  
224 on the Hilbert transform (Saad et al., 2003) as implemented in AFNI's Hilbert Delay  
225 plugin. For each voxel, this analysis returns the correlation coefficient (cc) and  
226 response delay at which the correlation between the empirical time-course and the  
227 reference waveform is maximum. The reference waveform was a sine wave with five  
228 cycles and a 31.5 s period matching the timing of the movement of sensory stimulation,  
229 which is swept across all four fingertips five times (i.e. for five cycles) with each cycle  
230 being 31.5 s in duration.

231

## 232 2.6 Bayesian pRF modeling

### 233 *2.6.1 Overview*

234 The pRF modeling was performed using the BayespRF Toolbox (available from  
235 <https://github.com/pzeidman/BayespRF>), which is dependent on Matlab (here we  
236 used version R2018b) and SPM (here we used version 12, available from  
237 <http://www.fil.ion.ucl.ac.uk/spm>). The BayespRF Toolbox was designed to provide a  
238 generic framework for mapping pRFs associated with stimulus spaces of any  
239 dimension onto the brain, but it was only evaluated by the developers for mapping 2-  
240 dimensional (2D) visual pRFs in human visual cortex (Zeidman et al., 2018). Here we  
241 modified and applied the toolbox to examine mapping somatosensory pRFs in human  
242 S1.

243

244 We adhered to the basic procedures outlined in the original publication associated with  
245 the BayespRF Toolbox (Zeidman et al., 2018), utilizing the following two scripts  
246 supplied with the toolbox: Run\_first\_level.m and Run\_pRF\_analysis.m. The first level

247 of analysis (Run\_first\_level.m) prepares the data for the pRF modeling procedure,  
248 mainly by reducing the number of voxel time-courses to model and hence the time  
249 required for the modeling computations. Within Run\_first\_level.m, this is achieved by  
250 performing a general linear model (GLM) analysis in SPM. Only data from voxels  
251 surviving threshold are then taken forward for the actual pRF modeling (per  
252 Run\_pRF\_analysis.m).

253

### 254 *2.6.2 Modifications for somatosensory space*

255 In order for the procedures to be suitable for our somatosensory data, some  
256 modifications were required at both stages of the original analysis (i.e., GLM and pRF  
257 modeling). The major modification required at the GLM stage was simply that of re-  
258 defining the task regressors. For the original visual pRF analysis, Run\_first\_level.m  
259 was set up with 9 task-related regressors. These were defined by dividing the visual  
260 field into 9 equal squares, and then building regressors based on the timing of visual  
261 stimulation within those 9 subfields. Here, we modified this by defining only 4  
262 regressors – one per fingertip.

263

264 At the pRF modeling stage, there were two main modifications required of the original  
265 analysis: (1) that of defining the stimulus space and (2) that of constraining the pRF  
266 parameters. In the original analysis, the stimulus space was defined in terms of  
267 degrees of visual angle and the limits were matched to the stimulus display. Here we  
268 defined the somatosensory space using the same 2D matrix but with arbitrary  
269 dimensions limited to  $\pm 10$  in both dimensions and divided along the x-axis into 4  
270 segments of equal width (representing each individual fingertip). It is important to note  
271 that the data we have can only be used to map across 1 dimension in this 2D sensory

272 space. The nature of our stimulators is such that the entire volar surface of each  
273 fingertip is stimulated before moving to the next digit, and hence, our data can only be  
274 used to map the across-digit dimension. However, within-digit somatotopy has, with  
275 the use of more spatially specific stimulation, been shown to run perpendicular to the  
276 across-digit dimension within the cortex (Sanchez-Panchuelo et al., 2012). For this  
277 reason, we kept the 2D representation of somatosensory space and addressed the  
278 limited nature of our data by constraining the pRF centers in one of the two dimensions  
279 (at  $y = 0$ ). Along with the use of symmetrical pRF models, this reduces the 2D problem  
280 to 1D (i.e., we only estimate location and size in the across-digit dimension). We did  
281 not place any constraints on the center location in the across-digit dimension (i.e., the  
282 center could be continuously distributed anywhere between  $x = \pm 10$ ). Constraints were  
283 also placed on the pRF size with the minimum size not being allowed to be less than  
284  $1/10^{\text{th}}$  of the sensory space occupied by a single fingertip, and the maximum size  
285 restricted to the equivalence of all four fingers (i.e., 20 units). While it is possible that  
286 some of the modeled voxels have pRFs that extend beyond the four fingertip  
287 representations in somatosensory space, we would not be able to resolve these given  
288 our experimental design.

289

### 290 *2.6.3 Application and voxel selection*

291 As mentioned, the first level of analysis was a simple GLM designed to reduce the  
292 number of voxel responses to be modeled by removing those voxels without task-  
293 related signals. Only data from voxels surviving threshold ( $p < 0.05$ , uncorrected) were  
294 taken forward for pRF modeling. The threshold at this first level was set liberally in  
295 order to prevent the exclusion of weak or potentially unusual signals that might still be  
296 able to be successfully modeled – at the cost of increased compute time. Surviving

297 voxels were then submitted to the second level of analysis, i.e., the pRF modeling.  
298 The main goal of this step was to optimize, on a voxel-wise basis, the fit between an  
299 estimated waveform and the empirically measured BOLD time-course by modifying  
300 the position and size of the pRF model. Following the procedure of Zeidman etl al.  
301 (2018), a second threshold was applied after the pRF modeling at a posterior model  
302 probability  $> 0.95$ . Voxels surviving this threshold were used for data visualization.  
303 Finally, data were restricted to only include voxels in primary somatosensory cortex.  
304 For this, we used the same S1 ROI as in our previous publication (defined using the  
305 independent, phase-delay analysis) (Puckett et al., 2017). Together, this resulted in  
306 the final set of voxels contributing to our pRF estimates.

307

## 308 2.7 Surface reconstruction and data visualization

309 Cortical reconstruction and volumetric segmentation were performed using  
310 FreeSurfer, which is freely available for download (<http://surfer.nmr.mgh.harvard.edu/>)  
311 (Dale et al., 1999; Dale and Sereno, 1993). Data were projected onto a  
312 computationally-inflated surface model using AFNI/SUMA. To map the data from  
313 volume to surface domains the volumetric data were sampled at 10 evenly spaced  
314 points between the white matter and pial surfaces. The most common value along  
315 each segment (i.e., the mode) was mapped onto the corresponding node of the  
316 inflated surface model. Note that the cortical surface models were only used for data  
317 visualization and region-of-interest (ROI) definition. All analyses and statistics were  
318 performed using the volumetric data.

319

### 320 **3. Results**

#### 321 3.1 Overview

322 Vibrotactile stimulation of the fingertips elicited a patch of BOLD activation in primary  
323 somatosensory cortex, along the post-central gyrus, in all subjects. We previously  
324 analysed these signals using a phase-delay technique revealing somatotopic  
325 organization with individual fingertip specificity within this patch (Fig. 1A) (Puckett et  
326 al., 2017). Here, we reanalyzed these signals using a recently established Bayesian  
327 pRF modeling framework (i.e., the BayespRF Toolbox) to investigate the possibility of  
328 estimating somatosensory pRFs from high-resolution fMRI data. We found, that with  
329 only minor modifications, the BayespRF Toolbox could be used to successfully model  
330 pRFs in S1. Examining the estimated pRF centers (Fig. 1b, top) reveals a nearly  
331 identical somatotopic map as that produced with the phase-delay approach. Whereas  
332 the delay analysis only provides estimates of each voxel's preferred fingertip  
333 (effectively its pRF center), the Bayesian modeling approach also provides estimates  
334 of the pRF size (Fig. 1B) as well as a number of neuronal and hemodynamic parameter  
335 (Fig. 1C).

336

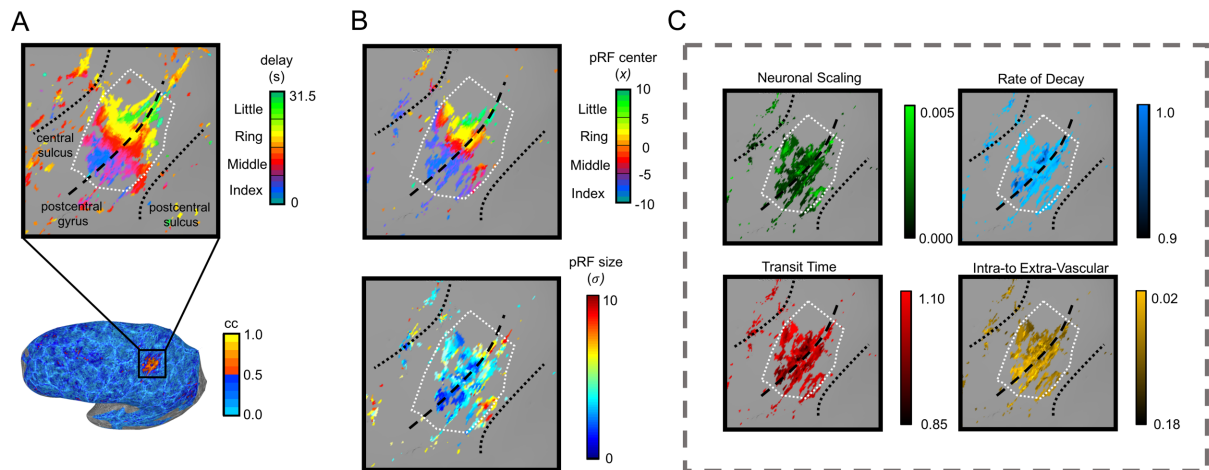

337

338 **Figure 1.** Activation in primary somatosensory cortex resulting from vibrotactile  
 339 stimulation of individual fingertips. (A) Results from the previous phase-delay analysis  
 340 showing the presence of an across-digit, somatotopic map in S1 (top), and the  
 341 associated correlation map (bottom) for anatomical orientation (adapted from Puckett  
 342 et al., 2017). (B) Results from the Bayesian modeling analysis. Color represents the  
 343 pRF center location in the top map and pRF size in the bottom. (C) In addition to pRF  
 344 parameters, the Bayesian approach also provides voxel-wise estimates of a number  
 345 of neuronal and hemodynamic parameters, shown here projected onto the cortical  
 346 surface model (scaling of neuronal response, transit time, rate of decay, and ratio of  
 347 intra-to extra-vascular signal). Note that this data is from Subject 1, the pRF was  
 348 modeled using a Gaussian response profile, and the white dashed line represented the  
 349 S1 ROI boundary.

350

### 351 3.2 Bayesian pRF analysis

352 As described in section 2.6, the pRF modeling analysis consisted of two levels (GLM  
 353 and pRF modeling stages) followed by the application of an S1 ROI to select the final  
 354 set of voxels used to examine the pRF estimates (voxel counts at the various stages  
 355 of analysis can be found supplementary Table S1). Figure 2 illustrates the single voxel  
 356 modeling results for three different voxels. For each, there is a depiction of the prior  
 357 and the posterior pRF models along with their respective predictive density (PD)  
 358 distributions, which represent the uncertainty in the pRF position and width. For  
 359 example, the prior PD was computed by averaging the responses across 1000  
 360 samples taken from the model's prior multivariate distribution over the parameter



361 space. The prior PD associated with each voxel in Figure 2 is characterized by a  
362 distribution stretching across the x-dimension (across-digit) but centered and focused  
363 at  $y=0$ . This reflects the fact that we constrained the pRF parameter space to be  
364 appropriate given our stimulation, which was only applied in the across-digit dimension  
365 (see section 2.6 for details). Importantly, the large degree of across-digit uncertainty  
366 visible in the prior PD for each voxel (Fig. 2) has been greatly reduced after the  
367 modeling procedure (evident in the more punctate distribution of the posterior PDs).

368

369 The close fit between the model and the data suggested by the reduction in uncertainty  
370 between the prior and posterior PDs can also be seen by inspection of the single voxel  
371 time-courses. Below the pRF estimates in Figure 2 are two traces showing the  
372 modeled waveform (red, solid line) atop the empirical BOLD time-course (black,  
373 dashed line) for that voxel, along with the percent variance explained by the modeled  
374 waveform. Note the close correspondence between the two traces as well as the high-  
375 degree of variance explained. For further interpretation, see the schematic of  
376 somatosensory space in the upper right of Figure 2 and recall that the pRF center  
377 could be distributed anywhere between  $x = \pm 10$  and each fingertip was defined as  
378 occupying an equal amount of that space (i.e., 5 units along the x-axis with fingertips  
379 ordered from index-middle-ring-little). Together then, inspection of the estimated pRFs  
380 shows that the first two voxels (Fig. 2A and B) have pRFs with similar center locations  
381 (middle finger) to one another but different sizes, whereas the third voxel's pRF (Fig.  
382 2C) has a similar size to the second but a different center location (ring finger).

383

384 In addition to the pRF parameters, the modeling procedure also estimates various  
385 neuronal and hemodynamic parameters (Fig. 1C). Zeidman et al., (2018) showed a  
386 practical benefit in allowing these parameters to vary on a voxel-by-voxel basis over  
387 the use of a canonical model (nearly 20% of voxels showed strong evidence in favor  
388 of the model with free parameters). This approach has a strong theoretical foundation  
389 as well given that it has been shown that hemodynamic response varies significantly  
390 across many factors such as subjects (Aguirre et al., 1998; Handwerker et al., 2004),  
391 days (Neumann et al., 2003), age (Jacobs et al., 2008), and brain region (Birn et al.,  
392 2001, Puckett et al., 2014). Although there is clear variability in hemodynamic and  
393 neuronal parameters present in our data, we had no explicit hypotheses regarding this  
394 variability. As such, the data presented in Figure 1C are primarily for illustrative  
395 purposes – with further analyses restricted to the pRF parameters only (i.e., center  
396 location and size).

397

### A. Voxel #1: middle finger, small

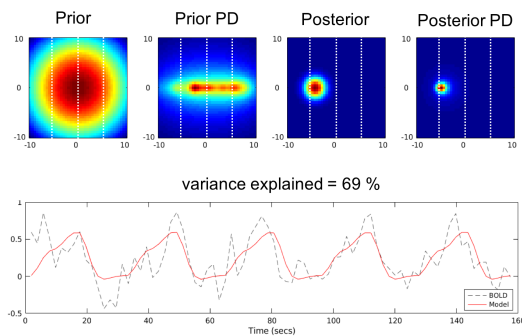

### Somatosensory Space

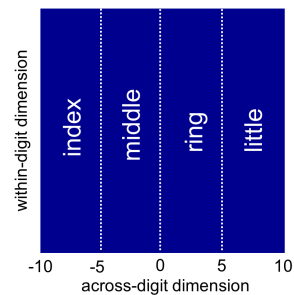

### B. Voxel #2: middle finger, large

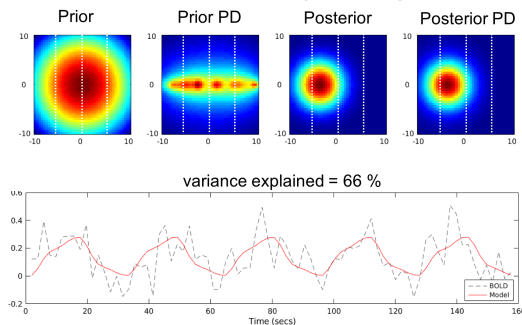

### C. Voxel #3: ring finger, large

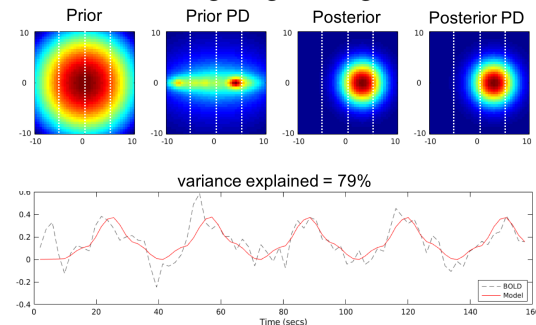

398  
399  
400  
401  
402  
403  
404  
405  
406  
407

**Figure 2.** Modeling results for three S1 voxels (A, B, and C) as well as a schematic of the representation of somatosensory space (upper right). For each voxel, the prior and the posterior pRF models are shown on top, along with their respective predictive density (PD) distributions which represents the degree of uncertainty in the pRF models. Vertical dashed white lines denote the separate digit representations. Below the pRF plots is the modeled waveform (red solid line) atop the empirical BOLD time-course (black dashed line). Note that the variance in the empirical time-course explained by the model is also shown. Data is from Subject 1.

### 408 3.3 Somatosensory pRF parameters

409 In agreement with our previous analysis, the pRF center estimates show an orderly  
410 representation of the fingertips along the post-central gyrus in response to vibrotactile  
411 stimulation in all subjects (Fig. 1B and Fig. 3). It can be seen that pRF center maps  
412 and the phase-delay maps from the previous analysis produce very similar  
413 somatotopic maps (cf. Fig. 1A and Fig. 1B for a single subject example; cf. Fig. 3 here  
414 and Fig. 3 in (Puckett et al., 2017) for all subjects). In addition to the pRF center  
415 location, the Bayesian modeling approach also provides estimates of the pRF sizes  
416 (Fig. 1B and Fig. 3). Qualitatively, the cortical surface maps of pRF size appear similar

417 among all subjects, with the exception of Subject 4, which appears to contain a higher  
418 proportion of large pRFs relative to the other subjects. Interestingly, in the other  
419 subjects there appears to be a banding pattern that runs parallel to the digit  
420 representations suggesting that the pRF sizes might vary in a digit specific manner.

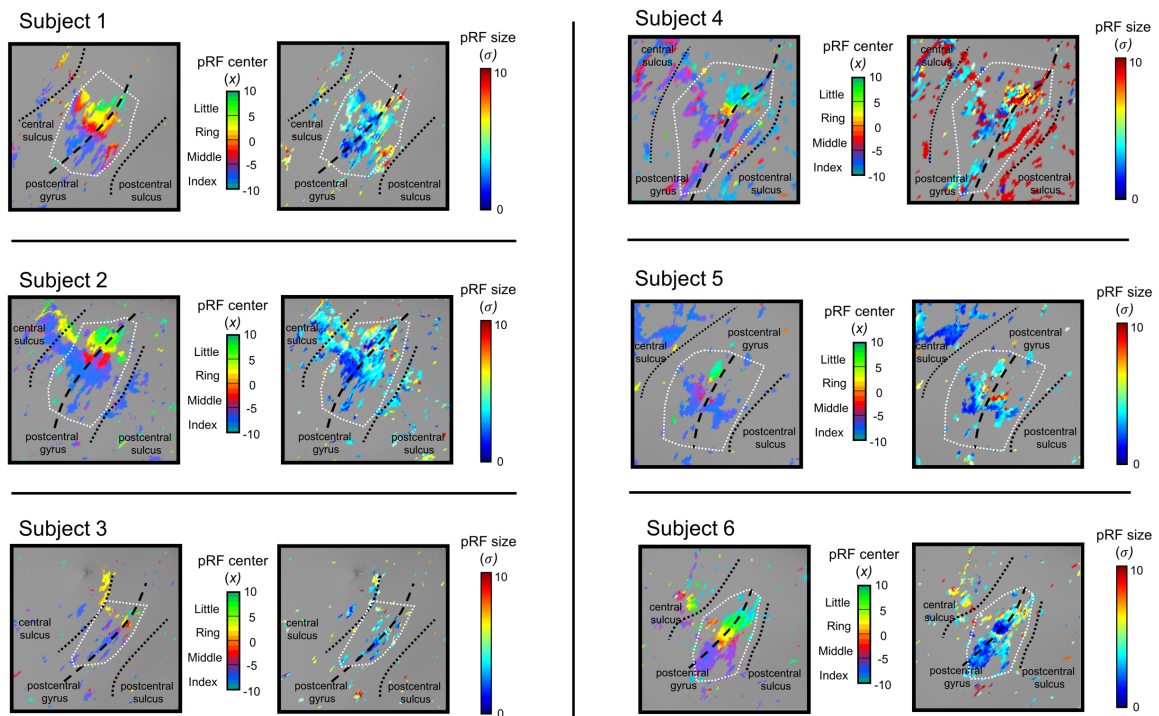

421 **Figure 3.** Cortical surface maps of the pRF parameters. For each individual subject,  
422 the pRF center locations (left) and the pRF sizes (right) are shown in S1 (zoomed in  
423 on the post-central gyrus, see Fig. 1A for anatomical orientation). White dashed line  
424 illustrates the ROI boundary.  
425  
426

427 To more quantitatively assess the pRF parameters, histograms were constructed at  
428 the individual and group level (Fig. 4, light grey). At the individual level, the histograms  
429 were made from voxel counts with the pRF centers binned according to each of the  
430 four digits and the pRF size binned per unit of somatosensory space. At the group  
431 level, histograms of pRF parameters were also constructed but represented in terms  
432 of the probability density rather than raw voxel counts. Inspection of the histograms  
433 reveals that variability exists at the individual subject level, yet it does appear that  
434 certain features seen within individual subjects emerge at the group level as well. Of

435 particular note is the disproportionate number of voxels dedicated to the index finger  
436 compared to the others (middle, ring, little). The pRF size estimates tend to be  
437 distributed between  $x = 0$  and 10 and skewed toward the smaller sizes in that range.  
438 However, a small population of voxels appear to have pRF size estimates distributed  
439 between  $x = 15$  and 20. To interpret these pRF size estimates, recall that each finger  
440 is defined as occupying 5 units of the somatosensory space, and hence, the entire  
441 somatosensory space being modeled here for the four fingertips spans 20 units.

442

443 In addition to the histograms, we computed the average pRF size per fingertip. This  
444 was done at the individual level from all surviving S1 voxels and at the group level by  
445 taking the mean of the average pRF size per fingertip across the individual subjects.  
446 Inspection of these graphs (Fig. 4, dark grey) for the individual subjects suggests that  
447 the pRF size does, in fact, vary according to digit, and this is supported by finding that  
448 the pRF centers and sizes were significantly correlated across voxels within 5 of 6  
449 individuals ( $p < 0.001$  for Subjects 1, 2, 3, 5, and 6;  $p = 0.78$  for Subject 4). At the  
450 group level, the most salient characteristic of this relationship evident in Figure 3 is  
451 that the little finger appears to be marked by larger pRFs than the other three digits.

452

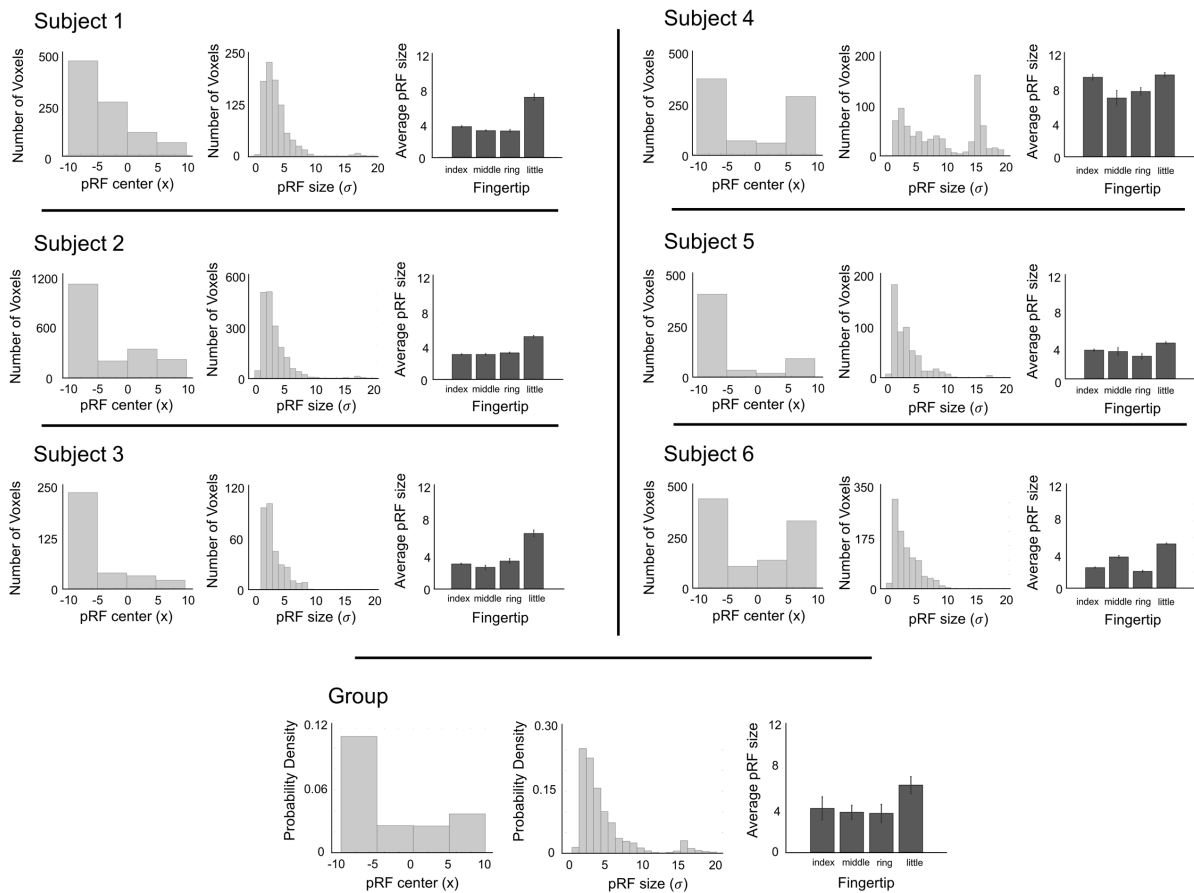

453

454 **Figure 4.** pRF parameters at the individual subject and group levels. Histograms of  
 455 pRF center location and size are illustrated as the light grey graphs. Average pRF size  
 456 per binned fingertip are illustrated as the dark grey graphs – error bars represent SEM  
 457 across voxels at the individual level and across individuals at the group level.

458

### 459 3.4 Gaussian vs. Difference of Gaussians pRF model

460 A number of visual pRF mapping studies (including that by Zeidman et al. using the  
 461 Bayesian approach) have shown that some voxels in visual cortex are better modeled  
 462 with a Difference of Gaussians (DoG) function compared to a single Gaussian model  
 463 (Zeidman et al., 2018; Zuiderbaan et al., 2012). The main difference being that the  
 464 DoG effectively incorporates a suppressive zone around the Gaussian's excitatory  
 465 center. Because the DoG model has additional parameters compared to the Gaussian  
 466 model (i.e., is fundamentally more complex), testing for the most appropriate model

467 type often involves applying some sort of information criterion after the pRF analysis  
468 (e.g., Akaike's information criterion) (Akaike, 1974; Puckett and DeYoe, 2015);  
469 however, one of the strengths of the Bayesian pRF modeling approach is that the  
470 estimation procedure directly provides an approximation of the model evidence – the  
471 negative variational free energy ( $F$ ). The free energy term increases with model  
472 accuracy and decreases with model complexity, and can hence be used to compare  
473 pRF models in order to determine the most accurate, least complex explanation of the  
474 data.

475

476 To assess whether the DoG function might also better model the pRFs in  
477 somatosensory cortex, we reran the entire pRF modeling analysis but with a  
478 symmetrical DoG pRF profile. Afterwards, we inspected the pRF center maps  
479 produced using a DoG pRF model, finding – that as expected – both the Gaussian  
480 and DoG models produced nearly identical maps (see Supplementary Fig. S1 for an  
481 example). Next, to determine which model best accounted for the data, we compared  
482 the  $F$  values at the individual and group levels. For individual subjects, we performed  
483  $t$ -tests between the free energy values for all the voxels that survived threshold for  
484 both the Gaussian and DoG analyses (see supplementary Table S1 to see the  
485 proportion of these joint voxels). In doing so, we found a higher  $F$  value associated  
486 with the Gaussian model for all 6 subjects with this difference being statistically  
487 significant in 5 of these 6 subjects ( $p \leq 0.005$  for Subjects 1, 2, 3, 5, and 6;  $p = 0.12$   
488 for Subject 4) – in favor of the Gaussian model. However, this did not survive at the  
489 group level when comparing the average  $F$  values for each subject; there was no  
490 statistical difference at the group level between the two model types ( $p = 0.13$ ).

491

## 492 **4. Discussion**

### 493 4.1 Overview

494 This study used high-resolution fMRI at 7T and a recently established Bayesian  
495 framework (i.e., the Bayesprf Toolbox) to estimate pRFs in somatosensory cortex.  
496 Vibrotactile stimulation of the fingertips drove BOLD response modulation in S1, along  
497 the post-central gyrus. These responses were then used to estimate the size, location,  
498 and topography of the pRFs in S1. We were able to successfully model pRFs  
499 associated with all four of the stimulated fingertips, in all subjects. We found more  
500 voxels with pRF center locations at the index finger than the other three digits (middle,  
501 ring, little). We also found that pRF size correlated with the center location – with the  
502 little finger marked by larger pRFs than the other digits. Evidence was found within  
503 individual subjects suggesting that the pRFs in somatosensory cortex estimated using  
504 our stimulation paradigm are better characterized by a simple, excitatory Gaussian  
505 profile than one that incorporates a suppressive surround (i.e., a DoG profile), although  
506 this was not confirmed by a statistical test at the group level.

507

### 508 4.2 The somatosensory population receptive field

509 Somatosensory cortex is responsible for processing information from a number of  
510 different sensory receptors distributed throughout the body including  
511 mechanoreceptors, thermoreceptors, nociceptors, and chemoreceptors (Kandel et al.  
512 2000). Given the nature of our stimulation (i.e., vibrotactile), we expect the responses  
513 measured in S1 to primarily be driven by activation of cutaneous mechanoreceptors.  
514 However, there are multiple types of mechanoreceptors, each with different receptive  
515 field properties. There are four main types of mechanoreceptors in the glabrous skin  
516 of humans: Merkel disc receptors, Meissner (or tactile) corpuscles, Pacinian (or



517 Lamellar) corpuscles, and Ruffini (or Bulbous) corpuscles. Of these, the Merkel,  
518 Meissner, and Pacinian receptor types all respond to different frequencies of  
519 mechanical stimulation whereas the Ruffini corpuscles are primarily responsive to skin  
520 stretch related to mechanical deformation within joints (Grigg and Hoffman, 1982). The  
521 slowly adapting Merkel cells are most sensitive to low frequency stimulation (10 Hz),  
522 whereas rapidly adapting Meissner corpuscles are most sensitive to vibrotactile  
523 frequencies of 30 Hz, and Pacinian corpuscles are most sensitive to high-frequency  
524 vibrations around 200 Hz (Friedman et al., 2004). Given that our stimulation  
525 continuously changes across a wide range of frequencies (5, 20, and 100 Hz), we  
526 expect that our pRF measurements reflect a mixture of all three of these receptor  
527 types.

528

529 The receptive field properties of the peripheral receptors have been well characterized  
530 (Johansson, 1978; Vallbo and Johansson, 1984). For example, we know that both  
531 Merkel and Meissner receptors have smaller pRFs than the Pacinian receptors.  
532 However, because the pRFs we estimate likely result from the stimulation of a mixture  
533 of different receptor types it is difficult to validate the results by comparing them directly  
534 to the known receptive field properties of specific peripheral receptors. Nonetheless,  
535 a number of our findings are in agreement with the known organization and response  
536 properties of the somatosensory system. The estimated pRF centers are in agreement  
537 with our previous analysis (Puckett et al., 2017) as well as other published work  
538 (Maldjian et al., 1999; Martuzzi et al., 2014; Sanchez-Panchuelo et al., 2010) showing  
539 a mediolateral ordering of digits along the post-central gyrus. In line with the known  
540 properties of cortical magnification (Duncan and Boynton, 2007; Sutherling et al.,

541 1992), our results also show a disproportionate number of voxels with pRFs centers  
542 associated with the index finger compared to the other digits.

543

544 We are aware of only one other published study that has reported pRF estimations in  
545 somatosensory cortex measured using fMRI (Schellekens et al., 2018). There are,  
546 however, two crucial differences between that study and the one here. First, the  
547 experiment by Schellekens et al. was designed to investigate pRF properties in motor  
548 cortex, not somatosensory. As such, the cortical responses were not driven by applied  
549 sensory stimulation but instead by movement of the digits. Under these conditions the  
550 authors were able to estimate pRFs in M1 (although these may better be referred to  
551 as “response” fields rather than “receptive” fields). In addition, they found an orderly  
552 map of pRFs in S1, presumably driven by the activation of deeper, proprioceptive  
553 receptors which respond to movement of finger joints rather than the more superficial  
554 mechanoreceptors targeted here (Edin, 1990). The second significant difference  
555 between this study and ours is methodological with Schellekens et al. using the  
556 conventional pRF approach rather than the Bayesian approach employed here.  
557 Despite these differences, we see similar results across the two studies. Specifically,  
558 we report the same spatial distribution of pRF center locations as well as larger pRF  
559 sizes for the little finger compared to the other three digits.

560

#### 561 4.3 Behavioral relevance

562 The three different types of mechanoreceptors contributing to our pRF estimates are  
563 known to be linked with different aspects of tactile perceptions (i.e. pressure, flutter,  
564 and vibration). The slowly adapting Merkel cells have been linked to perceptions of  
565 pressure, texture, and the form of an object, rapidly adapting Meissner corpuscles

566 appear to be integral to the perception of flutter, slip, and motion of objects, and  
567 Pacinian corpuscles are most sensitive to the perception of vibration (Friedman et al.,  
568 2004). Moreover, the tactile thresholds associated with each receptor type, and hence  
569 associated perceptive abilities, are known to vary (Ferrington et al., 1977). Being able  
570 to directly estimate somatosensory pRFs will provide opportunity to examine the  
571 relationship between pRF properties and these various tactile perceptions.

572

573 It is important to understand that pRF properties are not only relevant to the processing  
574 of different forms of bottom-up, sensory driven information, but that they also influence  
575 top-down effects such as attention. Findings have shown that attention modulates the  
576 responses of neurons with tactile receptive fields centered on an attended stimulus  
577 (Hsiao et al., 1993), and we have previously shown using high-resolution fMRI that the  
578 attentional field (AF) is able to modulate somatotopically appropriate regions of cortex  
579 with a fine level of detail (i.e., with individual fingertip specificity) (Puckett et al., 2017).

580 In fact, the authors of a recent review on somatosensory attention suggested that one  
581 key advantage of having a detailed neural representation of the body in the brain is so  
582 that attention can leverage the topographical organization to select stimuli based on  
583 their somatotopic location (Gomez-Ramirez et al., 2016). The exact nature of the  
584 somatosensory attentional field and how it interacts with pRFs, however, remains an  
585 active and important area of research. A larger amount of work investigating the  
586 interaction between RFs and AFs has been performed in visual cortex compared to  
587 somatosensory cortex, where it has been shown that the relative sizes of the RF, AF,  
588 and visual stimulus appear to influence what type of attentional modulation occurs  
589 (e.g., contrast-gain vs. response-gain) (Reynolds and Heeger, 2009). Empirical  
590 measurements of somatosensory pRFs will hence provide important data that can be

591 used to test for similar effects in somatosensory cortex, ultimately, contributing to an  
592 understanding of the neurophysiological basis of the perceptual effects associated  
593 with somatosensory attention.

594

#### 595 4.4 Limitations and future directions

596 This work clearly demonstrates the feasibility of using vibrotactile stimulation of  
597 peripheral mechanoreceptors to map pRFs in somatosensory cortex, but it is not  
598 without limitations. Addressing these limitations can help direct further development,  
599 and as such, we discuss a few of the potential future directions here. Perhaps the  
600 greatest limitation of the current study is the spatially coarse nature of the applied  
601 sensory stimulation. The vibrotactile stimulators used here are only capable of  
602 delivering stimulation to the entire volar surface of each individual fingertip. This  
603 effectively limits the ability to resolve very small pRFs as any receptive field smaller  
604 than an individual digit would be fully activated when stimulating that digit. The solution  
605 here is only a matter of engineering a MR-compatible device capable of administering  
606 more spatially specific stimulation, and work is already being done in this direction.  
607 For example, Dancer Design (<http://www.dancerdesign.co.uk/>) currently builds an MR-  
608 compatible device capable of delivering vibrotactile stimulation to an area of  $\sim 1\text{mm}^2$ .  
609 Using such a device would not only permit the fingers to be stimulated at a finer spatial  
610 scale in the across-digit dimension, but it would also permit stimulating multiple sites  
611 along each finger (i.e., mapping the within-digit dimension). In fact, a previous study  
612 did just this using the Dancer Design stimulator finding an orderly representation of  
613 the within-digit dimension running orthogonal to the across-digit dimension (Sanchez-  
614 Panchuelo et al., 2012). Positioning these small stimulators across both across- and  
615 within-digit dimensions would thus permit the pRFs to be more completely

616 characterized (e.g., by allowing one to test if the pRFs are symmetrical in both  
617 dimensions).

618

619 Using stimulation that would permit mapping across both across- and within-digit  
620 dimensions would also permit pRFs to be compared across the sub-regions of S1 as  
621 the within-digit mapping permits accurate delineation of these sub-regions (Sanchez-  
622 Panchuelo et al., 2012). The S1 ROI used here almost certainly contains multiple  
623 somatosensory areas, corresponding to the four cytoarchitecturally defined areas:  
624 3a, 3b, 1 and 2 (Brodmann 1909; Vogt and Vogt 1919). It has traditionally been held  
625 that these areas are tailored for specific functions and are differentially sensitive to the  
626 stimulation of different receptors (e.g. deep vs. cutaneous) (Iwamura et al., 1993;  
627 Powell and Mountcastle, 1959). They are also hierarchically organized with pRF size  
628 and feature complexity increasing as one progresses up this hierarchy (Bodegard et  
629 al., 2001; Iwamura, 1998). Being able to non-invasively measure the response  
630 properties within these sub-regions brings with it the opportunity to quantitatively  
631 examine their differences and subsequently relate them to human perception and  
632 behavior.

633

634 We see several potential applications of this technique; for example, one of the more  
635 obvious extensions of this line of research would be to examine pRFs encoding  
636 somatosensory space other than the four fingertip representations (i.e., the thumb, the  
637 face, the body, etc.). fMRI is already being used to map these other locations (Sanchez  
638 Panchuelo et al., 2018), and these endeavors would undoubtedly benefit from the  
639 richer data provided by the pRF approach compared to the more typical, phase-  
640 encoded or event-related approaches. Another particularly interesting extension of this

641 work would be to examine the feasibility of mapping pRFs from specific  
642 mechanoreceptor types. As mentioned, there exist four main types of  
643 mechanoreceptors in human skin and these have been shown to have different  
644 receptive field profiles when measuring from peripheral nerves. Although these  
645 differences are relatively minor between some receptor types, they are substantially  
646 different for others. For example, Pacinian corpuscles have RFs with only one zone of  
647 maximal sensitivity and the sensitivity profile changes gradually across the RF (similar  
648 to a Gaussian profile). However, the Meissner corpuscles and Merkel receptors are  
649 characterized by having multiple zones of maximal sensitivity and the sensitivity  
650 diminishes quickly with increasing distance away from these zones (Johansson,  
651 1978). As mentioned above, our vibrotactile stimulation likely drives activity in all three  
652 of these receptor types. But by using specific frequencies of vibrotactile stimulation it  
653 may be possible to bias the pRFs toward certain mechanoreceptor classes. Similarly,  
654 it is reasonable to expect that this technique could be used to estimate pRFs  
655 associated with somatosensory receptors other than mechanoreceptors. For example,  
656 it has been shown that detailed maps of the digits can be measured in S1 using fMRI  
657 when applying nociceptive-selective laser stimuli to the hand (Mancini et al., 2012).  
658 Combining this type of stimulation with a pRF mapping procedure should enable the  
659 nociceptive-related pRFs to be estimated. Finally, laminar differences in  
660 somatosensory RFs have been reported from invasive measurements in the macaque  
661 (Sur et al., 1985), and applying the pRF modeling procedure to sub-millimeter data  
662 suitable for laminar fMRI (Huber et al., 2018; Lawrence et al., 2017; Puckett et al.,  
663 2016) may permit investigation of cortical-depth dependent pRF differences in  
664 humans.

665

666 **5. Conclusion**

667 We show that it is possible to non-invasively estimate pRFs in primary somatosensory  
668 cortex using high-resolution fMRI at 7T and a freely available Bayesian pRF modeling  
669 toolbox. This was accomplished by passing vibrotactile stimulation across the  
670 individual fingertips to activate peripheral mechanoreceptors and corresponding  
671 neuronal populations in somatosensory cortex. The ability to estimate somatosensory  
672 pRFs in humans provides an exceptional opportunity to examine the cortical  
673 representation of the body in the brain, the response properties therein – and  
674 ultimately the cortical processes underlying somatosensation.

675 **Acknowledgments**

676 We thank Aiman Al-Najjar, Nicole Atcheson, and Steffen Bollmann for help with data  
677 collection, and the authors acknowledge the facilities of the National Imaging Facility  
678 (NIF) at the Centre for Advanced Imaging, University of Queensland. This work was  
679 supported by the Australian Research Council (DE180100433) and the National  
680 Health and Medical Research Council (APP 1088419). M.B. acknowledges funding  
681 from Australian Research Council Future Fellowship grant FT140100865, and S.B.  
682 acknowledges support through the Australian Government Research Training  
683 Program Scholarship.



684 **References**

- 685 Aguirre, G.K., Zarahn, E., D'Esposito, M., 1998. The variability of human, BOLD  
686 hemodynamic responses. *Neuroimage* 8, 360-369.
- 687 Akaike, H., 1974. A new look at the statistical model identification. *IEEE Trans*  
688 *Automatic Control* 19, 716-723.
- 689 Besle, J., Sanchez-Panchuelo, R.M., Bowtell, R., Francis, S., Schluppeck, D., 2013.  
690 Single-subject fMRI mapping at 7 T of the representation of fingertips in S1: a  
691 comparison of event-related and phase-encoding designs. *J Neurophysiol* 109,  
692 2293-2305.
- 693 Besle, J., Sanchez-Panchuelo, R.M., Bowtell, R., Francis, S., Schluppeck, D., 2014.  
694 Event-related fMRI at 7T reveals overlapping cortical representations for  
695 adjacent fingertips in S1 of individual subjects. *Hum Brain Mapp* 35, 2027-2043.
- 696 Birn, R.M., Saad, Z.S., Bandettini, P.A., 2001. Spatial heterogeneity of the nonlinear  
697 dynamics in the FMRI BOLD response. *Neuroimage* 14, 817-826.
- 698 Bodegard, A., Geyer, S., Grefkes, C., Zilles, K., Roland, P.E., 2001. Hierarchical  
699 processing of tactile shape in the human brain. *Neuron* 31, 317-328.
- 700 Breuer, F.A., Blaimer, M., Mueller, M.F., Seiberlich, N., Heidemann, R.M., Griswold,  
701 M.A., Jakob, P.M., 2006. Controlled aliasing in volumetric parallel imaging (2D  
702 CAIPIRINHA). *Magn Reson Med* 55, 549-556.
- 703 Brodmann K. 1909. *Vergleichende Lokalisationslehre der Großhirnrinde*. Leipzig: J.A.  
704 Barth.
- 705 Catani, M., 2017. A little man of some importance. *Brain* 140, 3055-3061.
- 706 Catania, K.C., Henry, E.C., 2006. Touching on somatosensory specializations in  
707 mammals. *Curr Opin Neurobiol* 16, 467-473.

- 708 Celesia, G.G., 1979. Somatosensory evoked potentials recorded directly from human  
709 thalamus and Sm I cortical area. Arch Neurol 36, 399-405.
- 710 Cox, R.W., 1996. AFNI: software for analysis and visualization of functional magnetic  
711 resonance neuroimages. Comput Biomed Res 29, 162-173.
- 712 Dale, A.M., Fischl, B., Sereno, M.I., 1999. Cortical surface-based analysis. I.  
713 Segmentation and surface reconstruction. Neuroimage 9, 179-194.
- 714 Dale, A.M., Sereno, M.I., 1993. Improved Localizadon of Cortical Activity by  
715 Combining EEG and MEG with MRI Cortical Surface Reconstruction: A Linear  
716 Approach. J Cogn Neurosci 5, 162-176.
- 717 Davis, K.D., Kwan, C.L., Crawley, A.P., Mikulis, D.J., 1998. Functional MRI study of  
718 thalamic and cortical activations evoked by cutaneous heat, cold, and tactile  
719 stimuli. J Neurophysiol 80, 1533-1546.
- 720 DeYoe, E.A., Carman, G.J., Bandettini, P., Glickman, S., Wieser, J., Cox, R., Miller,  
721 D., Neitz, J., 1996. Mapping striate and extrastriate visual areas in human  
722 cerebral cortex. Proc Natl Acad Sci U S A 93, 2382-2386.
- 723 Dumoulin, S.O., Wandell, B.A., 2008. Population receptive field estimates in human  
724 visual cortex. Neuroimage 39, 647-660.
- 725 Duncan, R.O., Boynton, G.M., 2007. Tactile hyperacuity thresholds correlate with  
726 finger maps in primary somatosensory cortex (S1). Cereb Cortex 17, 2878-  
727 2891.
- 728 Edin, B.B., 1990. Finger joint movement sensitivity of non-cutaneous  
729 mechanoreceptor afferents in the human radial nerve. Exp Brain Res 82, 417-  
730 422.
- 731 Engel, S.A., 2012. The development and use of phase-encoded functional MRI  
732 designs. Neuroimage 62, 1195-1200.

- 733 Engel, S.A., Rumelhart, D.E., Wandell, B.A., Lee, A.T., Glover, G.H., Chichilnisky,  
734 E.J., Shadlen, M.N., 1994. fMRI of human visual cortex. *Nature* 369, 525.
- 735 Ferrington, D.G., Nail, B.S., Rowe, M., 1977. Human tactile detection thresholds:  
736 modification by inputs from specific tactile receptor classes. *J Physiol* 272, 415-  
737 433.
- 738 Fleetwood-Walker, S.M., Hope, P.J., Mitchell, R., 1988. Antinociceptive actions of  
739 descending dopaminergic tracts on cat and rat dorsal horn somatosensory  
740 neurones. *J Physiol* 399, 335-348.
- 741 Fox, P.T., Burton, H., Raichle, M.E., 1987. Mapping human somatosensory cortex with  
742 positron emission tomography. *J Neurosurg* 67, 34-43.
- 743 Francis, S.T., Kelly, E.F., Bowtell, R., Dunseath, W.J., Folger, S.E., McGlone, F., 2000.  
744 fMRI of the responses to vibratory stimulation of digit tips. *Neuroimage* 11, 188-  
745 202.
- 746 Friedman, R.M., Chen, L.M., Roe, A.W., 2004. Modality maps within primate  
747 somatosensory cortex. *Proc Natl Acad Sci U S A* 101, 12724-12729.
- 748 Gelnar, P.A., Krauss, B.R., Szeverenyi, N.M., Apkarian, A.V., 1998. Fingertip  
749 representation in the human somatosensory cortex: an fMRI study.  
750 *Neuroimage* 7, 261-283.
- 751 Gomez-Ramirez, M., Hysaj, K., Niebur, E., 2016. Neural mechanisms of selective  
752 attention in the somatosensory system. *J Neurophysiol* 116, 1218-1231.
- 753 Greenberg, J.H., Reivich, M., Alavi, A., Hand, P., Rosenquist, A., Rintelmann, W.,  
754 Stein, A., Tusa, R., Dann, R., Christman, D., Fowler, J., MacGregor, B., Wolf,  
755 A., 1981. Metabolic mapping of functional activity in human subjects with the  
756 [18F]fluorodeoxyglucose technique. *Science* 212, 678-680.

- 757 Grigg, P., Hoffman, A.H., 1982. Properties of Ruffini afferents revealed by stress  
758 analysis of isolated sections of cat knee capsule. *J Neurophysiol* 47, 41-54.
- 759 Griswold, M.A., Jakob, P.M., Heidemann, R.M., Nittka, M., Jellus, V., Wang, J., Kiefer,  
760 B., Haase, A., 2002. Generalized autocalibrating partially parallel acquisitions  
761 (GRAPPA). *Magn Reson Med* 47, 1202-1210.
- 762 Haegens, S., Nacher, V., Hernandez, A., Luna, R., Jensen, O., Romo, R., 2011. Beta  
763 oscillations in the monkey sensorimotor network reflect somatosensory  
764 decision making. *Proc Natl Acad Sci U S A* 108, 10708-10713.
- 765 Handwerker, D.A., Ollinger, J.M., D'Esposito, M., 2004. Variation of BOLD  
766 hemodynamic responses across subjects and brain regions and their effects on  
767 statistical analyses. *Neuroimage* 21, 1639-1651.
- 768 Hong, J.H., Kwon, H.G., Jang, S.H., 2011. Probabilistic somatotopy of the  
769 spinothalamic pathway at the ventroposterolateral nucleus of the thalamus in  
770 the human brain. *AJNR Am J Neuroradiol* 32, 1358-1362.
- 771 Horch, K.W., Tuckett, R.P., Burgess, P.R., 1977. A key to the classification of  
772 cutaneous mechanoreceptors. *J Invest Dermatol* 69, 75-82.
- 773 Hsiao, S.S., O'Shaughnessy, D.M., Johnson, K.O., 1993. Effects of selective attention  
774 on spatial form processing in monkey primary and secondary somatosensory  
775 cortex. *J Neurophysiol* 70, 444-447.
- 776 Huber, L., Ivanov, D., Handwerker, D.A., Marrett, S., Guidi, M., Uludag, K., Bandettini,  
777 P.A., Poser, B.A., 2018. Techniques for blood volume fMRI with VASO: From  
778 low-resolution mapping towards sub-millimeter layer-dependent applications.  
779 *Neuroimage* 164, 131-143.

- 780 Ibanez, V., Fischer, G., Mauguiere, F., 1992. Dorsal horn and dorsal column  
781 dysfunction in intramedullary cervical cord tumours. A somatosensory evoked  
782 potential study. *Brain* 115 ( Pt 4), 1209-1234.
- 783 Iwamura, Y., 1998. Hierarchical somatosensory processing. *Curr Opin Neurobiol* 8,  
784 522-528.
- 785 Iwamura, Y., Tanaka, M., Sakamoto, M., Hikosaka, O., 1993. Rostrocaudal gradients  
786 in the neuronal receptive field complexity in the finger region of the alert  
787 monkey's postcentral gyrus. *Exp Brain Res* 92, 360-368.
- 788 Jacobs, J., Hawco, C., Kobayashi, E., Boor, R., LeVan, P., Stephani, U., Siniatchkin,  
789 M., Gotman, J., 2008. Variability of the hemodynamic response as a function of  
790 age and frequency of epileptic discharge in children with epilepsy. *Neuroimage*  
791 40, 601-614.
- 792 Jeanmonod, D., Sindou, M., Magnin, M., Boudet, M., 1989. Intra-operative unit  
793 recordings in the human dorsal horn with a simplified floating microelectrode.  
794 *Electroencephalogr Clin Neurophysiol* 72, 450-454.
- 795 Johansson, R.S., 1978. Tactile sensibility in the human hand: receptive field  
796 characteristics of mechanoreceptive units in the glabrous skin area. *J Physiol*  
797 281, 101-125.
- 798 Kandel ER, Schwartz JH, Jessell TM. 2000. *Principles of Neural Science*, McGraw  
799 Hill.
- 800 Lawrence, S.J.D., Formisano, E., Muckli, L., de Lange, F.P., 2017. Laminar fMRI:  
801 Applications for cognitive neuroscience. *Neuroimage*.
- 802 Lederman, S.J., Klatzky, R.L., 2009. Haptic perception: a tutorial. *Atten Percept*  
803 *Psychophys* 71, 1439-1459.

- 804 Lenz, F.A., Dostrovsky, J.O., Tasker, R.R., Yamashiro, K., Kwan, H.C., Murphy, J.T.,  
805 1988. Single-unit analysis of the human ventral thalamic nuclear group:  
806 somatosensory responses. *J Neurophysiol* 59, 299-316.
- 807 Liu, J.V., Hirano, Y., Nascimento, G.C., Stefanovic, B., Leopold, D.A., Silva, A.C.,  
808 2013. fMRI in the awake marmoset: somatosensory-evoked responses,  
809 functional connectivity, and comparison with propofol anesthesia. *Neuroimage*  
810 78, 186-195.
- 811 Maldjian, J.A., Gottschalk, A., Patel, R.S., Detre, J.A., Alsop, D.C., 1999. The sensory  
812 somatotopic map of the human hand demonstrated at 4 Tesla. *Neuroimage* 10,  
813 55-62.
- 814 Mancini, F., Haggard, P., Iannetti, G.D., Longo, M.R., Sereno, M.I., 2012. Fine-grained  
815 nociceptive maps in primary somatosensory cortex. *J Neurosci* 32, 17155-  
816 17162.
- 817 Marques, J.P., Kober, T., Krueger, G., van der Zwaag, W., Van de Moortele, P.F.,  
818 Gruetter, R., 2010. MP2RAGE, a self bias-field corrected sequence for  
819 improved segmentation and T1-mapping at high field. *Neuroimage* 49, 1271-  
820 1281.
- 821 Martuzzi, R., van der Zwaag, W., Farthouat, J., Gruetter, R., Blanke, O., 2014. Human  
822 finger somatotopy in areas 3b, 1, and 2: a 7T fMRI study using a natural  
823 stimulus. *Hum Brain Mapp* 35, 213-226.
- 824 Mauguiere, F., Merlet, I., Forss, N., Vanni, S., Jousmaki, V., Adeleine, P., Hari, R.,  
825 1997. Activation of a distributed somatosensory cortical network in the human  
826 brain: a dipole modelling study of magnetic fields evoked by median nerve  
827 stimulation. Part II: Effects of stimulus rate, attention and stimulus detection.  
828 *Electroencephalogr Clin Neurophysiol* 104, 290-295.

- 829 Neumann, J., Lohmann, G., Zysset, S., von Cramon, D.Y., 2003. Within-subject  
830 variability of BOLD response dynamics. *Neuroimage* 19, 784-796.
- 831 Penfield, W., Boldrey, E., 1937. Somatic motor and sensory representations in the  
832 cerebral cortex of man as studied by electrical stimulation. *Brain* 60.
- 833 Poser, B.A., Koopmans, P.J., Witzel, T., Wald, L.L., Barth, M., 2010. Three  
834 dimensional echo-planar imaging at 7 Tesla. *Neuroimage* 51, 261-266.
- 835 Poser BA, Ivanov D, Kannenigiesser SA, Uludag K, Barth M. 2014a. CAIPIRINHA-  
836 accelerated 3D EPI for high temporal and/or spatial resolution EPI acquisitions.  
837 Proc. of the ISMRM 2014.
- 838 Poser BA, Ivanov D, Kannenigiesser SA, Uludag K, Barth M. 2014b. Accelerated 3D  
839 EPI using 2D blipped-CAIPI for high temporal and/or spatial resolution. Proc.  
840 22<sup>nd</sup> Scientific Meeting of the Int. Society for Magn. Reson. in Medicine, Milan,  
841 Italy 2014, #1506.
- 842 Powell, T.P., Mountcastle, V.B., 1959. Some aspects of the functional organization of  
843 the cortex of the postcentral gyrus of the monkey: a correlation of findings  
844 obtained in a single unit analysis with cytoarchitecture. *Bull Johns Hopkins*  
845 *Hosp* 105, 133-162.
- 846 Puckett, A.M., Aquino, K.M., Robinson, P.A., Breakspear, M., Schira, M.M., 2016. The  
847 spatiotemporal hemodynamic response function for depth-dependent  
848 functional imaging of human cortex. *Neuroimage* 139, 240-248.
- 849 Puckett, A.M., Bollmann, S., Barth, M., Cunnington, R., 2017. Measuring the effects  
850 of attention to individual fingertips in somatosensory cortex using ultra-high field  
851 (7T) fMRI. *Neuroimage* 161, 179-187.
- 852 Puckett, A.M., DeYoe, E.A., 2015. The attentional field revealed by single-voxel  
853 modeling of fMRI time courses. *J Neurosci* 35, 5030-5042.

- 854 Puckett, A.M., Mathis, J., DeYoe, E.A., 2014. An investigation of positive and inverted  
855 hemodynamic response functions across multiple visual areas. *Hum Brain*  
856 *Mapp* 35, 5550-5564.
- 857 Reynolds, J.H., Heeger, D.J., 2009. The normalization model of attention. *Neuron* 61,  
858 168-185.
- 859 Saad, Z.S., DeYoe, E.A., Ropella, K.M., 2003. Estimation of fMRI response delays.  
860 *Neuroimage* 18, 494-504.
- 861 Saad, Z.S., Reynolds, R.C., 2012. *Suma*. *Neuroimage* 62, 768-773.
- 862 Sanchez Panchuelo, R.M., Besle, J., Schluppeck, D., Humberstone, M., Francis, S.,  
863 2018. Somatotopy in the Human Somatosensory System. *Front Hum Neurosci*  
864 12, 235.
- 865 Sanchez-Panchuelo, R.M., Besle, J., Beckett, A., Bowtell, R., Schluppeck, D., Francis,  
866 S., 2012. Within-digit functional parcellation of Brodmann areas of the human  
867 primary somatosensory cortex using functional magnetic resonance imaging at  
868 7 tesla. *J Neurosci* 32, 15815-15822.
- 869 Sanchez-Panchuelo, R.M., Francis, S., Bowtell, R., Schluppeck, D., 2010. Mapping  
870 human somatosensory cortex in individual subjects with 7T functional MRI. *J*  
871 *Neurophysiol* 103, 2544-2556.
- 872 Schellekens, W., Petridou, N., Ramsey, N.F., 2018. Detailed somatotopy in primary  
873 motor and somatosensory cortex revealed by Gaussian population receptive  
874 fields. *Neuroimage* 179, 337-347.
- 875 Schott, G.D., 1993. Penfield's homunculus: a note on cerebral cartography. *J Neurol*  
876 *Neurosurg Psychiatry* 56, 329-333.



- 877 Sereno, M.I., Dale, A.M., Reppas, J.B., Kwong, K.K., Belliveau, J.W., Brady, T.J.,  
878 Rosen, B.R., Tootell, R.B., 1995. Borders of multiple visual areas in humans  
879 revealed by functional magnetic resonance imaging. *Science* 268, 889-893.
- 880 Setsompop, K., Gagoski, B.A., Polimeni, J.R., Witzel, T., Wedeen, V.J., Wald, L.L.,  
881 2012. Blipped-controlled aliasing in parallel imaging for simultaneous multislice  
882 echo planar imaging with reduced g-factor penalty. *Magn Reson Med* 67, 1210-  
883 1224.
- 884 Sur, M., Garraghty, P.E., Bruce, C.J., 1985. Somatosensory cortex in macaque  
885 monkeys: laminar differences in receptive field size in areas 3b and 1. *Brain*  
886 *Res* 342, 391-395.
- 887 Sutherling, W.W., Levesque, M.F., Baumgartner, C., 1992. Cortical sensory  
888 representation of the human hand: size of finger regions and nonoverlapping  
889 digit somatotopy. *Neurology* 42, 1020-1028.
- 890 Vallbo, A.B., Hagbarth, K.E., 1968. Activity from skin mechanoreceptors recorded  
891 percutaneously in awake human subjects. *Exp Neurol* 21, 270-289.
- 892 Vallbo, A.B., Johansson, R.S., 1984. Properties of cutaneous mechanoreceptors in  
893 the human hand related to touch sensation. *Hum Neurobiol* 3, 3-14.
- 894 Vogt C, Vogt O. 1919. Allgemeiner Ergebnisse unserer Hirnforschung. *J Psychol*  
895 *Neurol* 25:279–462.
- 896 Yamada, K., Nagakane, Y., Yoshikawa, K., Kizu, O., Ito, H., Kubota, T., Akazawa, K.,  
897 Oouchi, H., Matsushima, S., Nakagawa, M., Nishimura, T., 2007. Somatotopic  
898 organization of thalamocortical projection fibers as assessed with MR  
899 tractography. *Radiology* 242, 840-845.
- 900 Zahneisen, B., Ernst, T., Poser, B.A., 2015. SENSE and simultaneous multislice  
901 imaging. *Magn Reson Med* 74, 1356-1362.

- 902 Zeidman, P., Silson, E.H., Schwarzkopf, D.S., Baker, C.I., Penny, W., 2018. Bayesian  
903 population receptive field modelling. *Neuroimage* 180, 173-187.
- 904 Zimny, M.L., 1988. Mechanoreceptors in articular tissues. *Am J Anat* 182, 16-32.
- 905 Zimny, M.L., Albright, D.J., Dabezies, E., 1988. Mechanoreceptors in the human  
906 medial meniscus. *Acta Anat (Basel)* 133, 35-40.
- 907 Zuiderbaan, W., Harvey, B.M., Dumoulin, S.O., 2012. Modeling center-surround  
908 configurations in population receptive fields using fMRI. *J Vis* 12, 10.

909 **Supplementary Material**

910 **Table S1.** Voxel counts after the GLM, pRF modeling, and ROI restriction for all  
 911 subjects. The raw datasets contained 1,769,472 voxels. The term “joint” refers to  
 912 common voxels between the Gaussian and DoG analyses, within the S1 ROIs.

| Subject | Voxel Count  |                       |        |               |       |       |
|---------|--------------|-----------------------|--------|---------------|-------|-------|
|         | After<br>GLM | After<br>pRF Modeling |        | Within<br>ROI |       |       |
|         |              | Gaussian              | DoG    | Gaussian      | DoG   | Joint |
| 1       | 73,758       | 12,798                | 12,342 | 881           | 914   | 752   |
| 2       | 37,873       | 11,657                | 12,168 | 1,834         | 1,834 | 1,751 |
| 3       | 25,536       | 4,113                 | 3,807  | 333           | 323   | 289   |
| 4       | 30,290       | 8,449                 | 10,823 | 769           | 788   | 680   |
| 5       | 30,325       | 4,793                 | 4,997  | 541           | 516   | 488   |
| 6       | 30,978       | 6,600                 | 6,284  | 1,010         | 943   | 905   |

913

### Gaussian vs. DoG pRF Model

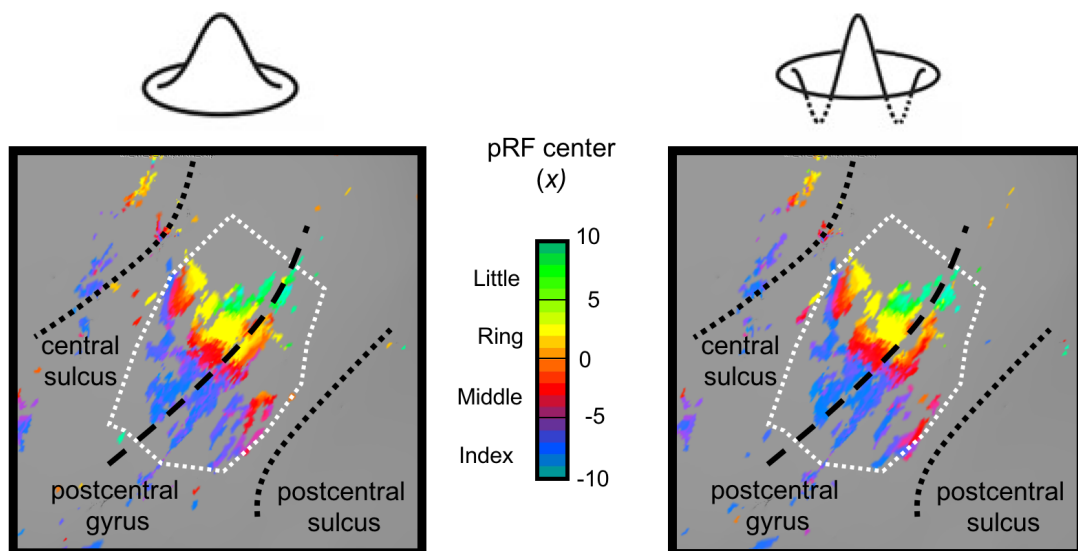

914

915 **Figure S1.** Gaussian vs. DoG pRF center maps for Subject 1.
